# Supplementary material for: A signal “switch-on” photoelectrochemical sensor based on a 3D-FM/BiOI heterostructure for the sensitive detection of l -ascorbic acid
Source: Royal Society of Chemistry journal article supplement (doi:10.1039/d3ra08288a), 2024-01-01
Supplement: d3ra08288a1.pdf [file d3ra08288a1.pdf]

## Supporting information

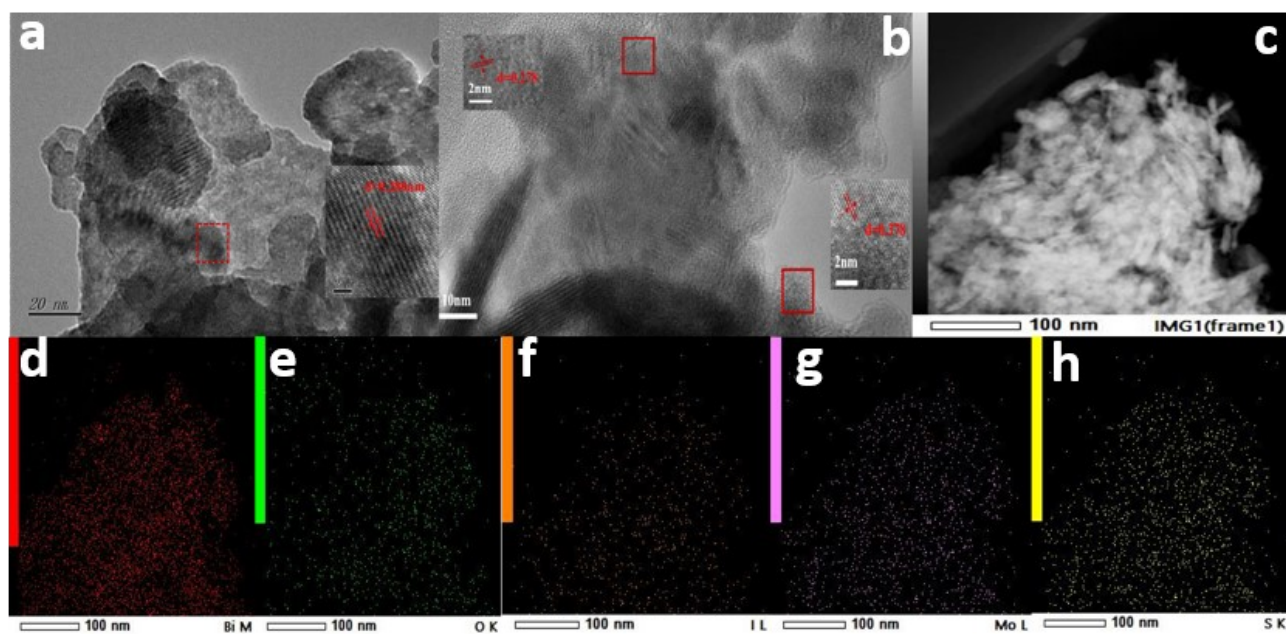

**Figure S1.** HRTEM images of 3D-FM/BiOI and energy-dispersive X-ray spectroscopy(EDS)(d~h).
